# Supplementary material
Source: publisher site journal article supplement (https://www.dovepress.com/get_supplementary_file.php?f=361613.docx)
Supplement: Supplementary file 1 [file get_supplementary_file.php]

**Supplementary materials**

**Supplementary Table 1**. Comparison of lipid profiles between male and female groups in patients with DR

|  | Male | Female | t | P |
| --- | --- | --- | --- | --- |
| N | 165 | 144 |  |  |
| Age (years) | 55.58±12.54 | 57.71±10.92 | -1.594 | 0.112 |
| BMI (Kg/m2) | 24.74±3.42 | 24.15±3.98 | 1.391 | 0.165 |
| Hypertension N(%) | 71 (43.03%) | 77 (53.47%) | 3.36 | 0.067 |
| CHOL (mmol/L) | 4.47±1.24 | 4.93±1.29 | -3.206 | 0.001 |
| TRIG (mmol/L) | 1.72±1.08 | 1.88±1.43 | -1.147 | 0.252 |
| HDL-C (mmol/L) | 1.19±0.35 | 1.31±0.33 | -2.92 | 0.004 |
| LDL-C (mmol/L) | 2.73±1.06 | 2.98±1.15 | -1.972 | 0.05 |
| APOA (mmol/L) | 1.24±0.30 | 1.34±0.27 | -3.043 | 0.003 |
| APOB (mmol/L) | 0.95±0.31 | 1.08±0.37 | -3.197 | 0.002 |
| APOE (mmol/L) | 42.75±20.97 | 49.17±20.14 | -2.733 | 0.007 |
| LPA (mmol/L) | 152.14±197.16 | 210.03±309.07 | -1.931 | 0.055 |
| SDLDL (mmol/L) | 1.38±0.71 | 1.33±0.65 | 0.665 | 0.506 |
| HbA1c (%) | 7.62±1.55 | 7.79±1.50 | -1.001 | 0.318 |
| BUN (mmol/L) | 7.63±2.86 | 6.96±2.60 | 2.114 | 0.035 |
| CREA (umol/L) | 89.27±50.86 | 70.40±57.82 | 3.022 | 0.003 |
| UA (mmol/L) | 0.35±0.10 | 0.32±0.08 | 3.377 | 0.001 |
| DM duration (Years) | 11.91±8.16 | 13.94±8.04 | -2.198 | 0.029 |
| Insulin N(%) | 94 (56.97%) | 90 (62.50%) | 0.976 | 0.323 |
| Hypoglycemic agents N(%) | 101 (61.21%) | 72 (50.00%) | 3.923 | 0.048 |
| Eye lasers or surgery N(%) | 42 (25.45%) | 41 (28.47%) | 0.356 | 0.551 |
| Smoking N(%) | 47 (28.48%) | 1 (0.69%) | 45.26 | <0.001 |
| Drinking N(%) | 40 (24.24%) | 0 (0.00%) | 40.1 | <0.001 |
| Antihypertensive agents N(%) | 42 (25.45%) | 45 (31.25%) | 1.277 | 0.259 |
| Lipid-lowering agents N(%) | 11 (6.67%) | 9 (6.25%) | 0.022 | 0.882 |
| DM Family history N(%) | 71 (43.03%) | 63 (43.75%) | 0.016 | 0.899 |
| Cardiovascular disease N(%) | 12 (7.27%) | 9 (6.25%) | 0.127 | 0.722 |
| Kidney disease N(%) | 27 (16.36%) | 17 (11.81%) | 1.308 | 0.253 |
| Cerebrovascular disease N(%) | 12 (7.27%) | 11(7.64%) | 0.015 | 0.903 |

DM, diabetic mellitus; DR, diabetic retinopathy; N, number; BMI, body mass index; CHOL, cholesterol; TRIG, triglyceride; HDL-C, high-density lipoprotein cholesterol; LDL-C, low-density lipoprotein cholesterol; APOA, apolipoprotein A; APOB, apolipoprotein B; APOE, apolipoprotein E; LPA, lipoprotein a; SDLDL-C, small dense low-density lipoprotein cholesterol; HbA1c, hemoglobin A1c; BUN, blood urea nitrogen；CREA, serum creatine; UA, uric acid.

**Supplementary Table 2.** Comparison of lipid profiles in the age > 57 years subgroup of DR, DM and control groups

|  | Control group | DM group | DR group | F | P |
| --- | --- | --- | --- | --- | --- |
| N | 64 | 90 | 155 |  |  |
| Gender(Male/Female) | 22/42 | 39/51 | 78/77 | 4.795 | 0.091b |
| Age (years) | 64.58±5.02 | 66.31±4.14 | 65.98±5.56 | 2.408 | 0.092 |
| BMI (Kg/m2) | 23.74±3.64 | 23.80±2.98 | 24.34±3.49 | 1.103 | 0.333 |
| CHOL (mmol/L) | 4.66±1.25 | 4.55±1.03 | 4.62±1.21 | 0.159 | 0.853 |
| TRIG (mmol/L) | 1.63±0.87 | 1.83±1.31 | 1.79±1.26 | 0.536 | 0.586 |
| HDL-C (mmol/L) | 1.02±0.20 | 1.57±3.05 | 1.26±0.34 | 2.133 | 0.12a |
| LDL-C (mmol/L) | 3.01±1.04 | 2.89±0.95 | 2.73±1.03 | 1.847 | 0.159 |
| APOA (mmol/L) | 1.24±0.22 | 1.33±0.53 | 1.27±0.29 | 1.423 | 0.243 |
| APOB (mmol/L) | 0.91±0.26 | 0.94±0.25 | 0.98±0.32 | 1.376 | 0.254 |
| APOE (mmol/L) | 37.78±11.21 | 42.64±22.79 | 44.45±16.87 | 9.105 | 0.011b |
| LPA (mmol/L) | 155.03±146.17 | 187.03±210.73 | 163.44±195.04 | 1.759 | 0.415 |
| SDLDL (mmol/L) | 0.79±0.43 | 0.88±0.55 | 1.28±0.67 | 39.973 | <0.001bc |

DM, diabetic mellitus; DR, diabetic retinopathy; N, number; BMI, body mass index; CHOL, cholesterol; TRIG, triglyceride; HDL-C, high-density lipoprotein cholesterol; LDL-C, low-density lipoprotein cholesterol; APOA, apolipoprotein A; APOB, apolipoprotein B; APOE, apolipoprotein E; LPA, lipoprotein a; SDLDL-C, small dense low-density lipoprotein cholesterol. Differences among three groups were analysed using one-way ANOVA; a: p <0.05 for the difference between control and DM groups (LSD post hoc test); b: p <0.05 for the difference between DR and control groups (LSD post hoc test); c: p <0.05 for the difference between DR and DM groups (LSD post hoc test).

**Supplementary Table 3.** Comparison of lipid profiles between patients with DR and those with DM in treatment and non-treatment subgroups

|  |  | DR | DM | t | P |
| --- | --- | --- | --- | --- | --- |
| Non-treatment group | N | 33 | 83 |  |  |
|  | Gender (Male/Female) | 17/16 | 45/38 | 0.069 | 0.792 |
|  | Age (years) | 58.00±12.58 | 53.37±9.62 | -1.903 | 0.063 |
|  | BMI (Kg/m2) | 24.92±3.92 | 24.74±3.78 | -0.232 | 0.817 |
|  | CHOL (mmol/L) | 4.94±1.07 | 5.02±0.91 | 0.405 | 0.686 |
|  | TRIG (mmol/L) | 2.27±1.54 | 2.62±2.32 | 0.791 | 0.431 |
|  | HDL-C (mmol/L) | 1.24±0.37 | 1.60±3.17 | 0.658 | 0.512 |
|  | LDL-C (mmol/L) | 3.15±1.38 | 3.18±0.94 | 0.103 | 0.918 |
|  | APOA (mmol/L) | 1.34±0.23 | 1.40±0.53 | 0.525 | 0.601 |
|  | APOB (mmol/L) | 1.09±0.33 | 1.08±0.26 | -0.213 | 0.832 |
|  | APOE (mmol/L) | 50.82±25.81 | 48.38±17.21 | -0.407 | 0.684 |
|  | LPA (mmol/L) | 240.85±275.73 | 109.71±155.96 | -3.323 | 0.001 |
|  | SDLDL-C (mmol/L) | 1.41±0.56 | 1.85±0.91 | -2.512 | 0.012 |
|  | Lipid-lowering agents N(%) | 1 (3.03%) | 4 (4.82%) | 0.183 | 0.669 |
| Treatment group | N | 276 | 103 |  |  |
|  | Gender (Male/Female) | 148/128 | 49/54 | 1.1 | 0.294 |
|  | Age (years) | 56.40±11.76 | 60.45±10.41 | 3.07 | 0.002 |
|  | BMI (Kg/m2) | 24.41±3.68 | 24.15±3.11 | -0.628 | 0.531 |
|  | CHOL (mmol/L) | 4.66±1.30 | 4.63±1.04 | -0.218 | 0.828 |
|  | TRIG (mmol/L) | 1.74±1.21 | 1.94±1.67 | 1.121 | 0.264 |
|  | HDL-C (mmol/L) | 1.25±0.34 | 1.24±0.35 | -0.267 | 0.79 |
|  | LDL-C (mmol/L) | 2.81±1.07 | 2.86±0.80 | 0.42 | 0.675 |
|  | APOA (mmol/L) | 1.28±0.30 | 1.29±0.28 | 0.231 | 0.818 |
|  | APOB (mmol/L) | 1.00±0.35 | 0.97±0.26 | -1.066 | 0.288 |
|  | APOE (mmol/L) | 45.13±20.09 | 46.53±29.83 | -1.364 | 0.173 |
|  | LPA (mmol/L) | 171.74±253.84 | 167.37±200.12 | -0.973 | 0.33 |
|  | SDLDL-C (mmol/L) | 1.35±0.69 | 1.10±0.78 | -3.875 | <0.001 |
|  | Lipid-lowering agents N(%) | 19 (6.88%) | 5 (4.85%) | 0.521 | 0.470 |

DR, diabetic retinopathy; DM, diabetic mellitus; N, number; BMI, body mass index; CHOL, cholesterol; TRIG, triglyceride; HDL-C, high-density lipoprotein cholesterol; LDL-C, low-density lipoprotein cholesterol; APOA, apolipoprotein A; APOB, apolipoprotein B; APOE, apolipoprotein E; LPA, lipoprotein a; SDLDL-C, small dense low-density lipoprotein cholesterol.

**Supplementary Table 4.** Comparison of lipid profiles between patients with DR and those with DM in terms of HbA1c levels

|  | HbA1c ≤ 7.2% | | | |  | HbA1c > 7.2% | | | |
| --- | --- | --- | --- | --- | --- | --- | --- | --- | --- |
|  | DM | DR | t | P |  | DM | DR | t | P |
| N | 124 | 139 |  |  |  | 62 | 170 |  |  |
| Gender (Male/Female) | 64/60 | 77/62 | 0.377 | 0.539 |  | 30/32 | 88/82 | 0.207 | 0.649 |
| Age (years) | 56.14±10.72 | 55.20±12.84 | 0.637 | 0.525 |  | 59.60±10.18 | 57.69±10.86 | 1.201 | 0.231 |
| BMI (Kg/m2) | 24.45±3.47 | 24.24±3.24 | 0.503 | 0.615 |  | 24.34±3.36 | 24.64±4.04 | -0.537 | 0.592 |
| CHOL (mmol/L) | 4.88±0.98 | 4.51±1.32 | 2.617 | 0.009 |  | 4.64±1.04 | 4.83±1.23 | -1.097 | 0.274 |
| TRIG (mmol/L) | 2.29±2.03 | 1.74±1.04 | 2.721 | 0.007 |  | 2.15±1.97 | 1.84±1.41 | 1.31 | 0.191 |
| HDL-C (mmol/L) | 1.26±0.33 | 1.19±0.30 | 1.848 | 0.066 |  | 1.68±3.67 | 1.29±0.36 | 0.83 | 0.41 |
| LDL-C (mmol/L) | 3.02±0.85 | 2.74±1.22 | 2.234 | 0.026 |  | 2.95±0.93 | 2.94±1.00 | 0.049 | 0.961 |
| APOA (mmol/L) | 1.31±0.26 | 1.22±0.26 | 2.933 | 0.004 |  | 1.38±0.62 | 1.34±0.30 | 0.596 | 0.552 |
| APOB (mmol/L) | 1.02±0.26 | 0.97±0.36 | 1.178 | 0.24 |  | 1.01±0.27 | 1.04±0.33 | -0.65 | 0.517 |
| APOE (mmol/L) | 47.25±19.86 | 43.27±15.72 | -1.802 | 0.072 |  | 47.58±33.07 | 47.76±24.04 | -1.775 | 0.076 |
| LPA (mmol/L) | 142.55±174.70 | 196.04±276.02 | -1.024 | 0.306 |  | 139.83±201.54 | 165.29±239.66 | -1.021 | 0.307 |
| SDLDL-C (mmol/L) | 1.47±0.90 | 1.25±0.62 | -1.583 | 0.113 |  | 1.36±0.95 | 1.45±0.71 | -1.6 | 0.11 |

DR, diabetic retinopathy; DM, diabetic mellitus; N, number; BMI, body mass index; CHOL, cholesterol; TRIG, triglyceride; HDL-C, high-density lipoprotein cholesterol; LDL-C, low-density lipoprotein cholesterol; APOA, apolipoprotein A; APOB, apolipoprotein B; APOE, apolipoprotein E; LPA, lipoprotein a; SDLDL-C, small dense low-density lipoprotein cholesterol.
